# Supplementary material for: Gel-based cell manipulation method for isolation and genotyping of single-adherent cells
Source: Royal Society of Chemistry journal article supplement (doi:10.1039/c8an01456f), 2018-10-05
Supplement: c8an01456f1.pdf [file c8an01456f1.pdf]

*Supplementary Information*

**Gel-based cell manipulation method for isolation and  
genotyping of single-adherent cells**

Ryo Negishi,<sup>a</sup> Reito Iwata,<sup>a</sup> Tsuyoshi Tanaka,<sup>a</sup> David Kisailus,<sup>b</sup> Yoshiaki Maeda,<sup>a</sup> Tadashi  
Matsunaga,<sup>a, c</sup> and Tomoko Yoshino<sup>\*a</sup>

<sup>a</sup>Division of Biotechnology and Life Science, Institute of Engineering, Tokyo University of  
Agriculture and Technology, 2-24-16, Naka-cho, Koganei, Tokyo, 184-8588, Japan

<sup>b</sup>Department of Chemical and Environmental Engineering, University of California,  
Riverside, Room 343 Materials Science and Engineering Building, Riverside, CA 92521,  
USA

<sup>c</sup> Waseda Research Institute for Science and Engineering, Waseda University, 3-4-1 Okubo,  
Shinjuku-ku, Tokyo, 169-8555, Japan

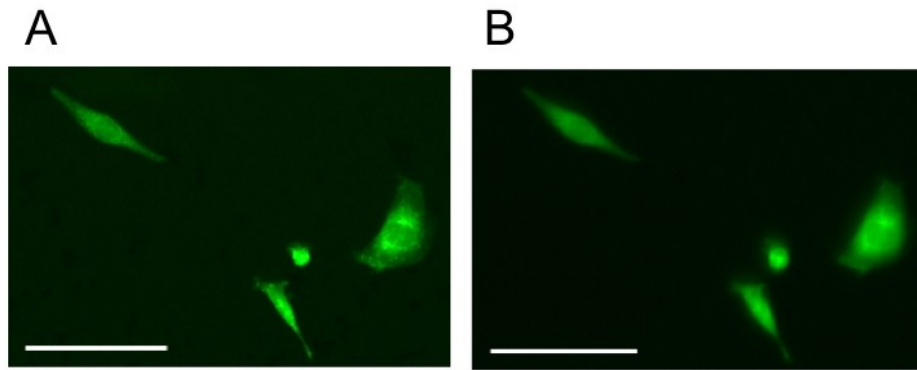

**Fig. S1 Fluorescence image of CellTracker Green-stained NCI-H1975 cells.**

A: Before trypsinization. B: After mild trypsinization (30 sec). Scale bar: 50  $\mu$ m

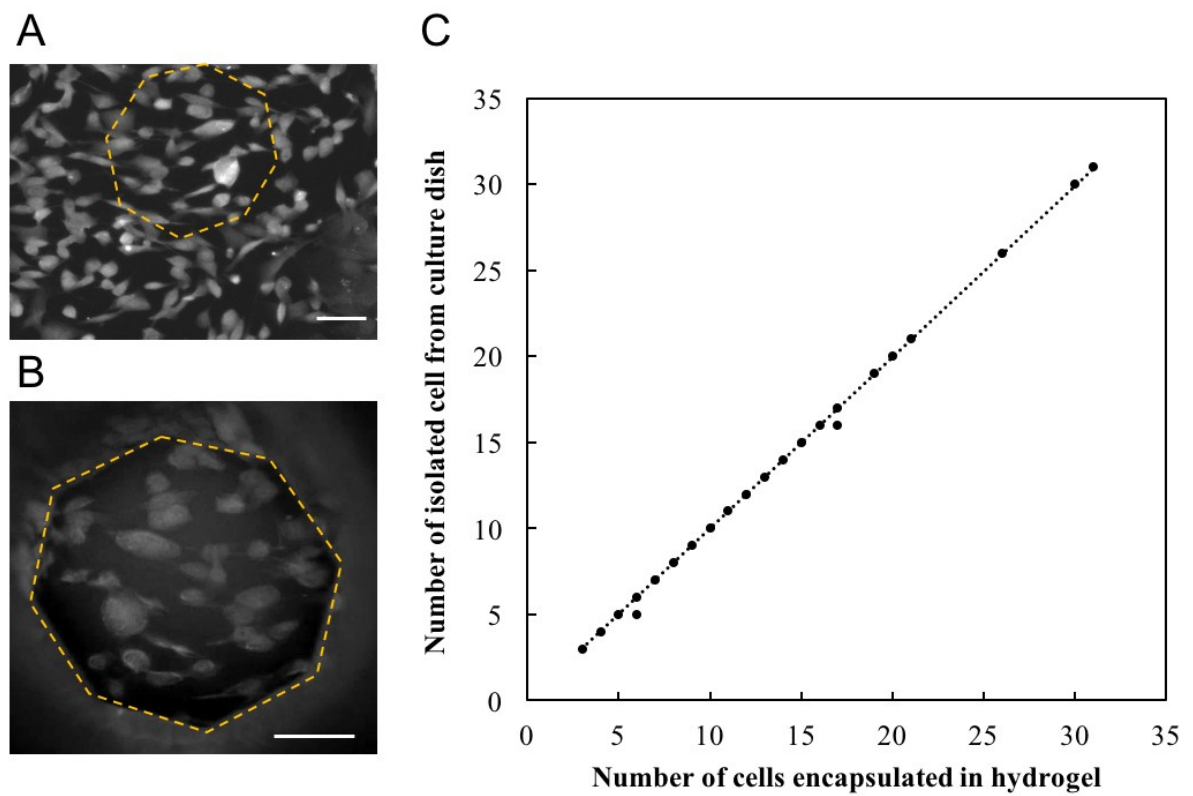

**Fig. S2 Isolation of adherent cells from dense culture.**

A: Fluorescence image of CellTracker Orange-stained NCI-H1975 cells adherent on a culture dish. Yellow dashed line shows hydrogel-encapsulation area. B: Fluorescence image of CellTracker Orange-stained NCI-H1975 cells encapsulated on a PEGDA hydrogel. Yellow dashed line shows the outline of the hydrogel. C: Relationship between the number of isolated cells and cells encapsulated on a single-PEGDA hydrogel. Scale bars: 100  $\mu\text{m}$

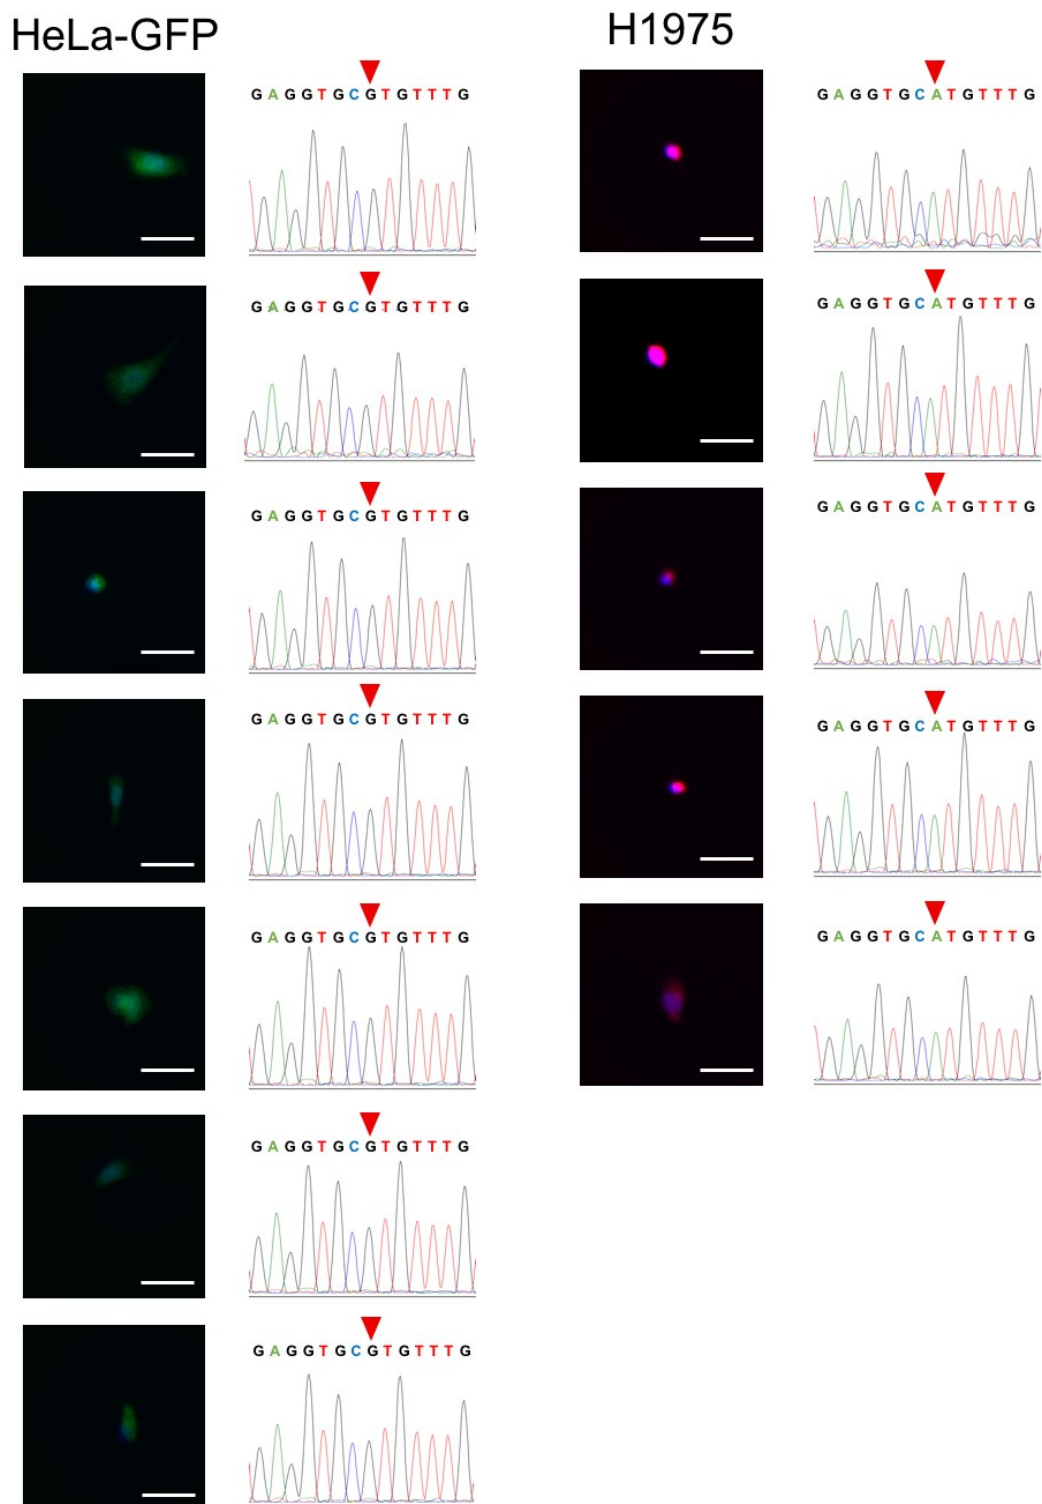

**Fig. S3 Genotyping of a single-adherent cell.**

Fluorescence images and sequences of the *TP53* gene in a single-HeLa-GFP and single-NCI-H1975 cell. Scale bars: 50  $\mu$ m
